# Supplementary material for: Hatchling survival to breeding age in Northern Pine Snakes (Pituophis melanoleucus) in the New Jersey Pine Barrens: Human effects on recruitment from 1986 to 2017
Source: PLoS One. 2018 May 14;13(5):e0195676. doi: 10.1371/journal.pone.0195676 (PMC5951674; doi:10.1371/journal.pone.0195676)
Supplement: S1 Table — (XLSX) [file pone.0195676.s001.xlsx]

## Sheet: Supplemental Table
	S1. Data on Pine Snake hatchling weight, sex, and survival to 5 years.
Obs	PITTAG	AGE	SEX	WGHT (g)	SVL (cm)
564	7F7F7F4F53	1	F	36	32
82	21372519	1	M	20	33
509	7F7F7B6C59	1	F	37.6	33
426	7F7F36447F	1	M	50	34
193	7F7D016652	1	M	26	35
194	7F7D01671A	1	M	35	35
56	21055789	1	F	28	36
93	21827866	1	F	24	36
241	7F7F260D6C	1	M	28	36
24	14263843	1	F	28	36.5
40	20795882	1	M	37	37
46	20890579	1	M	28	37
267	7F7F307B23	1	F	28	37
315	7F7F36325B	1	M	49	37
377	7F7F36393F	1	M	28	37
499	7F7F7A651B	1	F	27	37
522	7F7F7E2F03	1	F	24	37
123	221C12450B	1	M	26	37.2
142	221C281369	1	M	28	37.2
175	7F7364D62	1	F	27	37.2
49	21025788	1	F	28	37.7
91	21626122	1	F	34	38
120	221C0C1E0D	1	F	32	38
139	221C215749	1	F	34	38
206	7F7D01761E	1	F	26	38
242	7F7F260F3F	1	F	34	38
323	7F7F36363E	1	M	33	38
416	7F7F364206	1	F	31	38
479	7F7F364F2D	1	M	32	38
581	841020520	1	F	32	38
218	7F7D023868	1	F	32	38.2
143	221C2A3717	1	M	26	38.3
182	7F7D015407	1	M	32	38.5
202	7F7D016B39	1	F	30	38.5
571	840894002	1	F	30	38.5
573	841008102	1	M	28	38.5
574	841008558	1	F	34	38.5
165	221C375F08	1	F	32	38.6
104	20364F7665	1	M	30.5	38.9
25	14778288	1	F	36	39
29	20587380	1	F	30	39
168	221C38152B	1	M	38	39
177	7F7D015211	1	F	33	39
228	7F7E501F50	1	F	36	39
393	7F7F363B6B	1	M	36	39
404	7F7F363F07	1	M	29	39
421	7F7F364250	1	F	33	39
423	7F7F36445C	1	F	33.2	39
490	7F7F471C70	1	F	34	39
102	20361F34FC	1	F	34	39.3
42	20838829	1	F	26	39.5
106	2036521F39	1	F	42	39.5
549	7F7F7E4961	1	M	40	39.5
576	841014047	1	F	32	39.5
6	3287626	1	F	34	40
17	12370379	1	M	44	40
20	13090105	1	M	35	40
28	15121801	1	M	32	40
75	21326047	1	F	38	40
77	21352881	1	F	40	40
166	221C38006C	1	F	52	40
199	7F7D016956	1	F	42	40
221	7F7D02555C	1	F	37	40
303	7F7F363244	1	F	37.6	40
407	7F7F36405C	1	F	30.7	40
454	7F7F364C05	1	F	33	40
201	7F7D016B05	1	F	32	40.2
190	7F7D015F03	1	F	34	40.3
234	7F7F1E5D56	1	F	32	40.3
513	7F7F7B7607	1	F	34	40.3
398	7F7F363D4D	1	F	33	40.5
452	7F7F364B6A	1	M	39	40.5
583	841027636	1	F	30	40.5
141	221C28115D	1	M	31.5	40.6
205	7F7D017023	1	M	40	40.6
101	20074D1577	1	F	42	40.9
140	221C216617	1	F	39.5	40.9
240	7F7F1F1D1A	1	F	40	40.9
526	7F7F7E3B2A	1	F	37	40.9
16	12093550	1	M	38	41
30	20590616	1	M	42	41
45	20842840	1	M	34	41
92	21777819	1	F	39	41
163	221C354B0B	1	F	36	41
184	7F7D015B51	1	F	41	41
207	7F7D017C36	1	M	34	41
278	7F7F363105	1	F	47	41
322	7F7F363271	1	F	38	41
362	7F7F36380C	1	F	32	41
447	7F7F364B65	1	F	29.2	41
477	7F7F364E75	1	M	32.1	41
482	7F7F390569	1	F	38	41
495	7F7F77093E	1	M	33	41
551	7F7F7F071F	1	F	43	41
567	836525524	1	F	40	41
575	841012574	1	F	38	41
578	841014894	1	F	36	41
580	841020363	1	F	40	41
585	841029106	1	F	30	41
586	841071307	1	F	38	41
130	221C1B2F40	1	F	40	41.3
7	3299552	1	F	40	41.5
111	2037557064	1	F	41	41.5
572	840895638	1	F	38	41.5
248	7F7F27012B	1	F	40	41.6
508	7F7F7B603A	1	M	33	41.7
1	3278000	1	F	48	42
4	3287328	1	F	36	42
9	11805055	1	F	48	42
61	21101580	1	F	34	42
80	21358305	1	F	49	42
118	203779200	1	F	56	42
192	7F7D015F10	1	F	38	42
372	7F7F363834	1	M	40.5	42
376	7F7F36391F	1	F	39	42
405	7F7F363F5C	1	F	41.3	42
406	7F7F363F73	1	M	44.5	42
438	7F7F36463B	1	M	42	42
441	7F7F364969	1	M	41	42
466	7F7F364E1F	1	F	50	42
507	7F7F7B5F1B	1	M	42	42
519	7F7F7C7A3C	1	F	42	42
570	840890334	1	M	36	42
249	7F7F29190D	1	M	37	42.2
563	7F7F7F2277	1	M	38	42.3
107	2036643F07	1	F	56	42.4
121	221C11145C	1	F	54	42.5
176	7F7364F4B	1	M	42	42.5
502	7F7F7B1D0B	1	F	46	42.5
125	221C130C03	1	F	48.5	42.6
8	11581558	1	M	42	43
94	21834569	1	F	52	43
109	20367C317D	1	F	50	43
116	2037722017	1	F	56	43
122	221C121A471	1	F	42	43
183	7F7D015B17	1	F	44	43
439	7F7F36465D	1	M	45	43
464	7F7F364D75	1	M	41.3	43
516	7F7F7C6262	1	M	50	43
528	7F7F7E3D6A	1	F	43	43
560	7F7F7F224F	1	F	50	43
172	7F7363979	1	M	43	43.4
115	2037636C5A	1	M	43	43.5
328	7F7F36366E	1	F	44	43.5
584	841028108	1	F	48	43.5
136	221C1E437E	1	F	48	43.7
26	15050620	1	F	46	44
32	20777803	1	F	47	44
72	21310279	1	F	34	44
90	21625590	1	M	41	44
103	20364D5B02	1	M	60	44
119	221C0B5F28	1	M	50	44
353	7F7F363723	1	M	36	44
360	7F7F363803	1	M	55	44
440	7F7F364872	1	F	44.2	44
108	2036704476	1	M	56	44.5
159	221C2D6F29	1	M	46	44.8
523	7F7F7E307F	1	M	45	44.9
27	15090558	1	M	52	45
41	20837884	1	M	47	45
110	203739521E	1	F	46	45
160	221C353818	1	F	54	45
169	221C39141C	1	F	38.9	45
173	7F7364470	1	F	45	45
333	7F7F363679	1	M	51	45
354	7F7F363765	1	M	.	45
422	7F7F364456	1	F	41	45
478	7F7F364F06	1	F	54	45
566	836523352	1	F	50	45
568	836543319	1	M	62	45
579	841020080	1	F	42	45
582	841027344	1	M	46	45
164	221C356F12	1	F	62	45.5
70	21309019	1	F	60	46
83	21526795	1	F	62	46
510	7F7F7B7377	1	F	47	46
577	841014103	1	F	30	46
167	221C381012	1	F	62	46.2
527	7F7F7E3D0E	1	F	52	46.5
150	221C2B431D	1	F	62	46.8
47	21008341	1	F	54	47
225	7F7E501CS5E	1	F	40.2	47
434	7F7F364576	1	F	50	47
496	7F7F7A5022	1	F	49	47
565	836516588	1	F	48	47
246	7F7F26584D	1	M	62	47.9
129	221C19163F	1	M	71	48.5
144	221C2A397F	1	F	74	49
373	7F7F36384A	1	M	72	50
204	7F7D016C46	1	F	73	51
506	7F7F7B3B22	1	F	78	51
268	7F7F314837	1	F	82	53
31	20590616	2	M	140	57
262	7F7F2A3B1E	2	M	112	59
483	7F7F391858	2	M	93	59
12	12017547	2	F	118	62
124	221C12450B	2	M	120	62.4
105	20364F7665	2	M	114.5	63
279	7F7F363105	2	F	150	63
435	7F7F364576	2	F	129	63
178	7F7D015228	2	F	111	64
179	7F7D015251	2	M	141	65
273	7F7F335426	2	M	121	65
442	7F7F364A2B	2	M	139	65
504	7F7F7B356D	2	M	144	66
520	7F7F7C7A3C	2	F	140	66
363	7F7F363812	2	M	126.4	66.5
397	7F7F363C42	2	F	120	67
497	7F7F7A642F	2	M	170.5	67
99	80820837	2	F	176	68
465	7F7F364D75	2	M	172	68
491	7F7F5A1E64	2	F	141	68
500	7F7F7A6C5A	2	F	137	68.4
73	21311278	2	F	160	68.5
84	21608772	2	F	162	68.5
552	7F7F7F071F	2	F	176	68.5
558	7F7F7F190E	2	F	136	68.7
43	20840855	2	M	186	69
191	7F7D015F03	2	F	176	69
271	7F7F32636A	2	F	190	69
417	7F7F364206	2	F	182	69
186	7F7D015E6C	2	F	153	69.4
131	221C1B2F40	2	F	162	69.6
50	21025788	2	F	176	70
76	21326047	2	F	179	70
385	7F7F363A36	2	F	221	70
399	7F7F363E7F	2	F	157	70
424	7F7F36445C	2	F	155	70
112	20375D2725	2	F	202	70.2
269	7F7F317478	2	M	176	70.3
79	21354595	2	M	160	71
95	21845513	2	M	164	71
250	7F7F29190D	2	M	165.9	71
383	7F7F36397F	2	M	182	71
389	7F7F363B35	2	F	164	71
21	13893347	2	M	158	71.5
480	7F7F365909	2	F	160.5	71.5
10	11872534	2	F	192	72
117	2037722017	2	F	238	72
232	7F7F017645	2	F	196	72
247	7F7F26584D	2	M	164	72
455	7F7F364D01	2	F	222	72
48	21008341	2	F	162	73
57	21087003	2	M	210	73
235	7F7F1E5D56	2	F	213	73
453	7F7F364B6A	2	M	211	73
137	221C1F4B2C	2	F	214	73.5
448	7F7F364B65	2	F	157.3	73.5
200	7F7D016956	2	F	203.5	73.7
34	20795281	2	M	190	74
223	7F7E50126D	2	M	219	74
427	7F7F36447F	2	M	182	74
170	221C39141C	2	F	174	74.7
33	20777803	2	F	240	75
243	7F7F260F3F	2	F	198	75
514	7F7F7B7607	2	F	201.6	75
3	3284843	2	F	224	76
203	7F7D016B39	2	F	217	76
226	7F7E501CS5E	2	F	.	76
276	7F7F362F24	2	M	211	76
569	836543319	2	M	188	76
2	3278000	2	F	228	77
81	21358305	2	F	190	77
208	7F7D020E47	2	F	241	77
361	7F7F363803	2	M	226	77
378	7F7F363953	2	M	.	77
550	7F7F7E4961	2	M	189	77.4
444	7F7F364B1F	2	M	246	77.5
18	13025567	2	M	238	78
394	7F7F363B6B	2	M	247	78
213	7F7D020F06	2	F	237.5	78.2
304	7F7F363244	2	F	.	79
5	3287328	2	F	264	80
380	7F7F363978	2	M	218	80
408	7F7F364061	2	F	284	82
71	21309019	2	F	216	82.5
511	7F7F7B7377	2	F	242	83
334	7F7F363679	2	M	277	85
429	7F7F364570	2	F	209	85
324	7F7F36363E	2	M	250	86.5
559	7F7F7F190E	3	F	146	74.6
386	7F7F363A36	3	F	475	76
229	7F7E501F50	3	F	185	77
22	13893347	3	M	170	78
74	21311278	3	F	230	78
187	7F7D015E6C	3	F	147	78
227	7F7E501CS5E	3	F	400	80
274	7F7F335426	3	M	248	80
521	7F7F7C7A3C	3	F	234	81.3
11	11872534	3	F	212	82
132	221C1B2F40	3	F	272	82
484	7F7F391858	3	M	273	82
501	7F7F7A6C5A	3	F	205	83
126	221C130C03	3	F	266	83.8
133	221C1B3738	3	M	257	84
355	7F7F363765	3	M	253	84
263	7F7F2A3B1E	3	M	243	85
364	7F7F363812	3	M	288	85
374	7F7F36384A	3	M	254	85
467	7F7F364E1F	3	F	261.6	85
381	7F7F363978	3	M	293	86
13	12017547	3	F	315	86.1
272	7F7F32636A	3	F	312	86.2
296	7F7F36310A	3	M	320	86.5
85	21608772	3	F	292	87
492	7F7F5A1E64	3	F	376	87.3
233	7F7F017645	3	F	307	87.8
270	7F7F317478	3	M	286	87.9
456	7F7F364D01	3	F	269	88
161	221C353818	3	F	306	89.7
329	7F7F363674	3	F	330	90
180	7F7D015251	3	M	315	90.2
390	7F7F363B35	3	F	288	91
280	7F7F363105	3	F	306	92
400	7F7F363E7F	3	F	216	92
443	7F7F364A2B	3	M	377	92
553	7F7F7F071F	3	F	404	92
78	21354595	3	F	318	93
481	7F7F365909	3	F	218	93
44	20840855	3	M	376	95
209	7F7D020E47	3	F	481	95
428	7F7F36447F	3	M	357	95
51	21025788	3	F	332	96
463	7F7F364D75	3	F	370	96
529	7F7F7E3D6A	3	F	409	96
561	7F7F7F224F	3	F	376	97
436	7F7F364576	3	F	476	97.5
515	7F7F7B7607	3	F	420.5	97.6
316	7F7F36325B	3	M	433	98
171	221C39141C	3	F	356	99
418	7F7F364206	3	F	492	99
503	7F7F7B1D0B	3	F	375	99
524	7F7F7E307F	3	M	387	99.1
236	7F7F1E5D56	3	F	530.5	99.6
251	7F7F29190D	3	M	413	99.9
174	7F7364470	3	F	417	100
449	7F7F364B65	3	F	405	101
505	7F7F7B356D	3	M	415	101.9
325	7F7F36363E	3	M	416	102
195	7F7D01671A	3	M	503	103
335	7F7F36367E	3	F	.	103
409	7F7F364061	3	F	.	103
224	7F7E50126D	3	M	548	104
395	7F7F363B6B	3	M	462	104
214	7F7D020F06	3	F	459	105
512	7F7F7B7377	3	F	622	117
277	7F7F362F24	4	M	390	85
188	7F7D015E6C	4	F	238	89
23	13893347	4	M	306	92
230	7F7E501F50	4	F	379	93
96	21845513	4	M	352	97
457	7F7F364D01	4	F	448	97
35	20795281	4	M	420	98
425	7F7F36445C	4	F	347	98
138	221C1F4B2C	4	F	688	99
391	7F7F363B35	4	F	419	102
468	7F7F364E1F	4	F	541	102
264	7F7F2A3B1E	4	M	526	102.3
382	7F7F363978	4	M	540	103
181	7F7D015251	4	M	552	103.5
14	12017547	4	F	594	104
330	7F7F363674	4	F	.	104
219	7F7D023868	4	F	437	105
86	21608772	4	F	610	106
493	7F7F5A1E64	4	F	620	106
19	13025567	4	M	560	107
275	7F7F335426	4	M	539	107
401	7F7F363E7F	4	F	442	107
485	7F7F391858	4	M	516	107
281	7F7F363105	4	F	648	107.5
297	7F7F36310A	4	M	.	108
62	21284870	4	M	460	108.3
127	221C130C03	4	F	600	108.7
326	7F7F36363E	4	M	517	109
430	7F7F364570	4	F	694	109
305	7F7F363244	4	F	373	110
356	7F7F363765	4	M	566	110
365	7F7F363812	4	M	504	110
375	7F7F36384A	4	M	612	110
113	20375D2725	4	F	524	112
535	7F7F7E4156	4	M	633	113
196	7F7D01671A	4	M	689	113.8
252	7F7F29190D	4	M	551	114
530	7F7F7E3D6A	4	F	708	114
237	7F7F1E5D56	4	F	662	115
437	7F7F364576	4	F	796	115
450	7F7F364B65	4	F	588	115
554	7F7F7F071F	4	F	724	115.5
162	221C353818	4	F	798	116.8
185	7F7D015B51	4	F	780	120
215	7F7D020F06	4	F	807	122
336	7F7F36367E	4	F	344	123
231	7F7E501F50	5	F	500	104
97	21845513	5	M	605	105
458	7F7F364D01	5	F	562	105
189	7F7D015E6C	5	F	469	107.8
387	7F7F363A36	5	F	696	108.5
317	7F7F36325B	5	M	640	110
431	7F7F364570	5	F	850	110
306	7F7F363244	5	F	700	111.5
384	7F7F36397F	5	M	642	112
151	221C2B431D	5	F	593	113
327	7F7F36363E	5	M	624	113
128	221C130C03	5	F	796	114
265	7F7F2A3B1E	5	M	805.9	114
337	7F7F36367E	5	F	729	114
555	7F7F7F071F	5	F	771	114
220	7F7D023868	5	F	752	115
410	7F7F364061	5	F	658	115
87	21608772	5	F	678	116
331	7F7F363674	5	F	340	116
392	7F7F363B35	5	F	772	116
63	21284870	5	M	764	116.5
15	12017547	5	F	844	117
494	7F7F5A1E64	5	F	960	117
238	7F7F1E5D56	5	F	938	118
298	7F7F36310A	5	M	900	118
402	7F7F363E7F	5	F	490	118
282	7F7F363105	5	F	791	119
366	7F7F363812	5	M	669	119
419	7F7F364206	5	F	743	120
451	7F7F364B65	5	F	764	121
486	7F7F391858	5	M	743	122
244	7F7F260F3F	5	F	903	122.4
531	7F7F7E3D6A	5	F	870	125.7
379	7F7F363953	5	M	926	128
536	7F7F7E4156	5	M	879	128
253	7F7F29190D	5	M	887	130
562	7F7F7F224F	5	F	824	131
